# Supplementary material for: Determinants of Cell-to-Cell Variability in Protein Kinase Signaling
Source: PubMed Central journal article supplement (PMC3854479; doi:10.1371/journal.pcbi.1003357), 2013-12-05

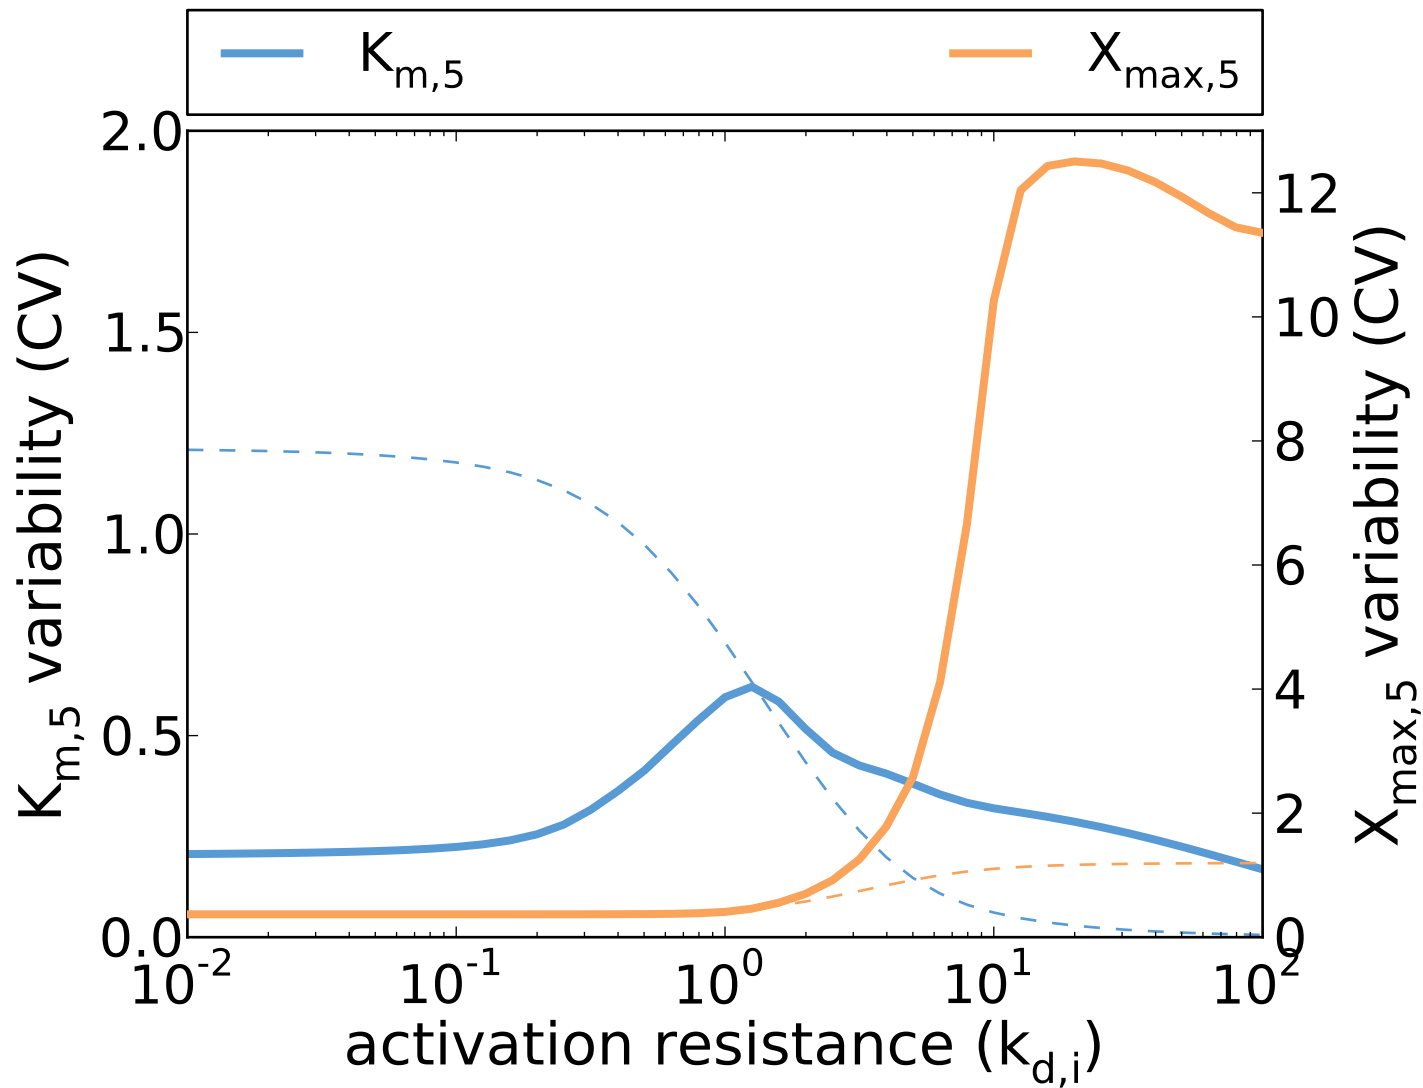

Supplement: pcbi.1003357.s005.pdf [file pcbi.1003357.s005.pdf]
